# Supplementary material for: Sensitive, quantitative, and high-throughput detection of angiogenic markers using shape-coded hydrogel microparticles
Source: Royal Society of Chemistry journal article supplement (doi:10.1039/c5an00358j), 2015-01-01

## Supplementary

Figure S1: Size (area) distribution of A) circle, B) triangle, and c) rectangle hydrogel particles before and after swelling.

Fig S2: Comparison of swelling ratio of the shape-encoded hydrogel particles. The particles were incubated in PBS for 9 days at 37 °C and the sizes of particles before and after swelling were analyzed. Error bars are S.E.M (N=3).

Fig S3: Typical images of hydrogel particles incubated with 2500 pg/ml of A) VEGF, B) FGF, and C) PDGF and the corresponding fluorescent intensity profiles within circle, triangle, and rectangle- shaped hydrogel particles.

Figure S1

A)

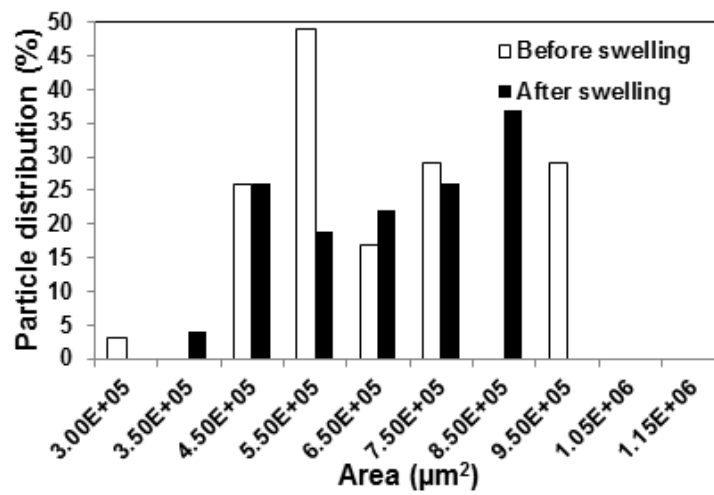

B)

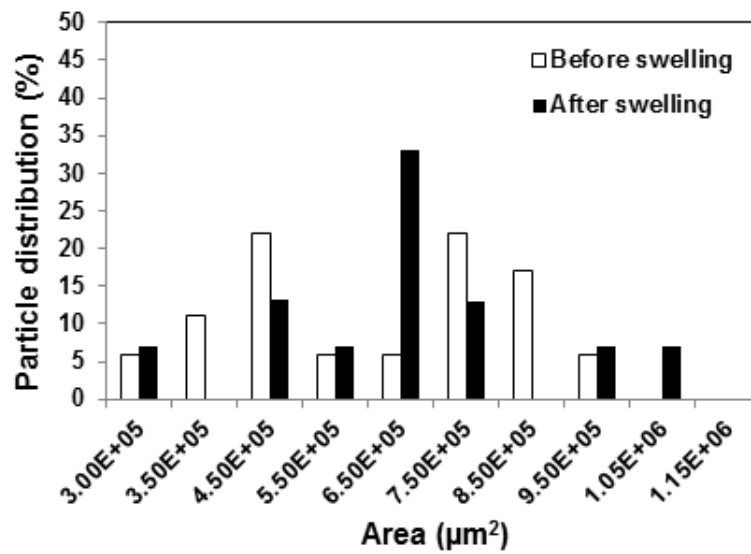

C)

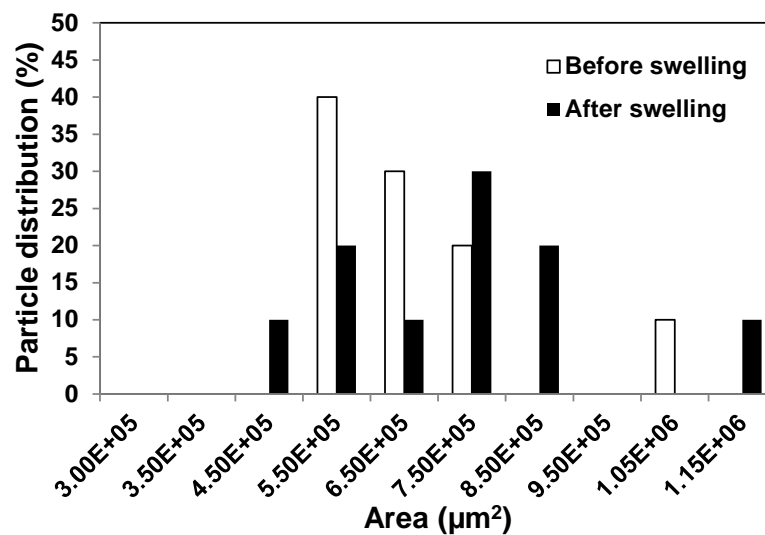

Figure S2

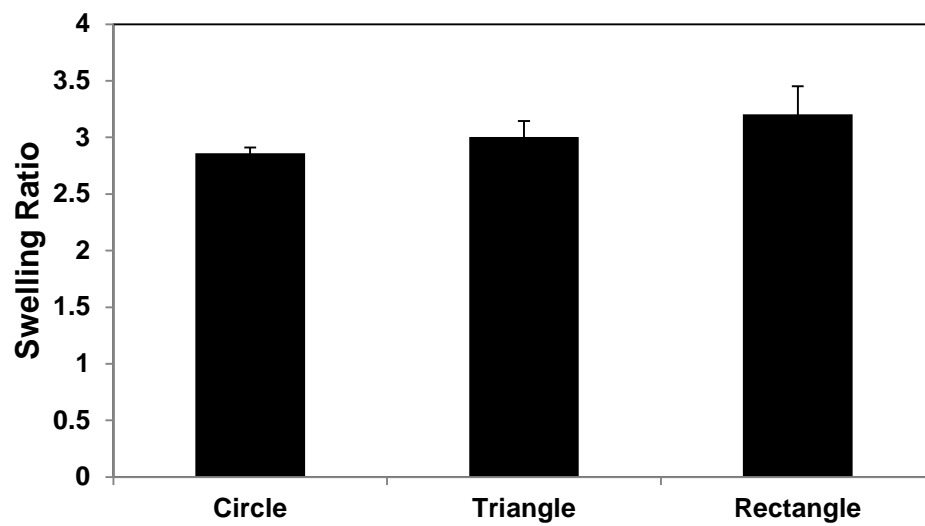

Figure S3

A)

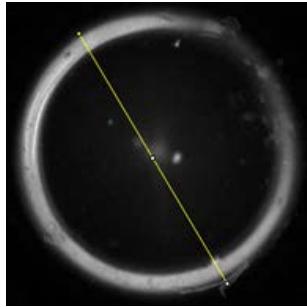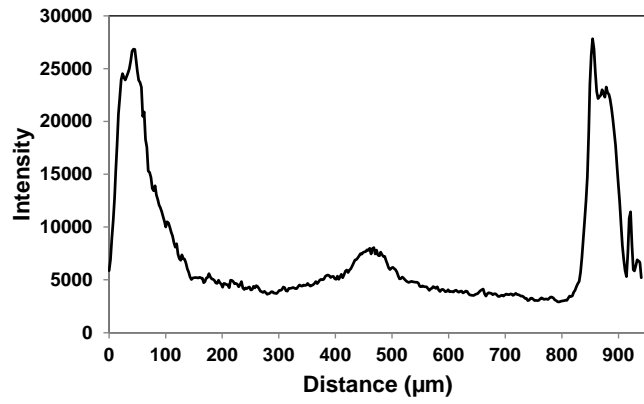

B)

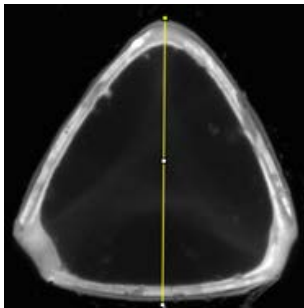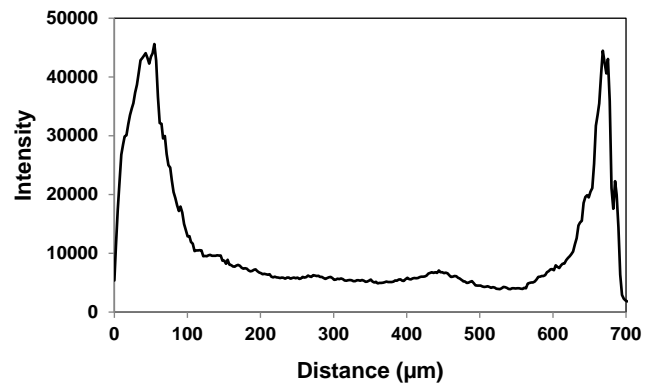

C)

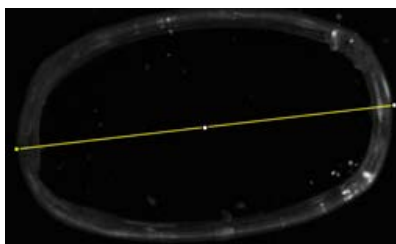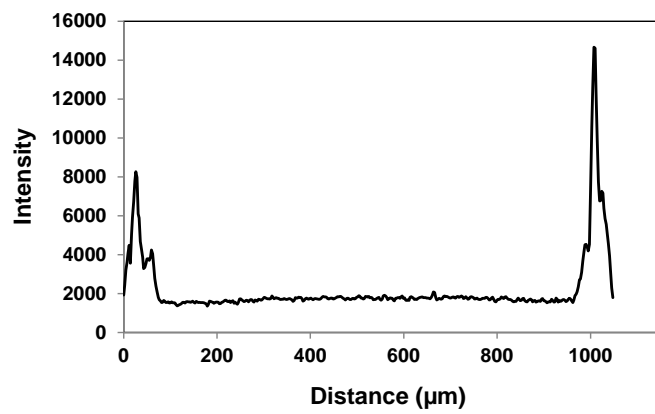

Supplement: c5an00358j1.pdf [file c5an00358j1.pdf]
